# Supplementary material
Source: PubMed Central journal article supplement (PMC5587861)
Supplement: supp_RA117.000102_4672_1_supp_3057_kskm9f.pdf [file supp_RA117.000102_4672_1_supp_3057_kskm9f.pdf]

## **SUPPLEMENTARY DOCUMENTS**

### **Metaproteomics reveals functional differences in intestinal microbiota development of preterm infants**

Zwittink RD<sup>1</sup>, van Zoeren-Grobbe D<sup>2</sup>, Martin R<sup>3</sup>, van Lingen RA<sup>2</sup>, Groot Jebbink LJ<sup>2</sup>, Boeren S<sup>4</sup>, Renes IB<sup>3</sup>, van Elburg RM<sup>3,5</sup>, Belzer C<sup>1,\*</sup>, Knol J<sup>1,3,\*</sup>

1. Laboratory of Microbiology, Wageningen University, Wageningen, the Netherlands
2. Princess Amalia Dpt of Paediatrics, Dpt of Neonatology, Isala, Zwolle, The Netherlands
3. Nutricia Research, Utrecht, The Netherlands
4. Laboratory of Biochemistry, Wageningen University, Wageningen, The Netherlands
5. Emma Children's Hospital, AMC, Amsterdam, The Netherlands

\* These authors contributed equally

**Running title:** Microbiota development in preterm infants

#### **Corresponding Author:**

Clara Belzer

Laboratory of Microbiology, Wageningen University; Stippeneng 4, 6708WE, Wageningen, The Netherlands T: +31 483751 E-mail: [clara.belzer@wur.nl](mailto:clara.belzer@wur.nl)

## **SUPPLEMENTARY DOCUMENTS**

## **Content:**

Table S1: **Sampling scheme for metaproteomics and 16S-rRNA sequencing.** Red dots: samples for metaproteomics, Black dots: samples for 16s-rRNA gene sequencing, A-J: individual infants.

Table S2: **Contents of the in-house generated protein database.**

Table S3: **Correlation between 16S- and protein-based taxonomic classification.** P-values below 0.05 are considered significant (Spearman correlation with Monte Carlo permutation 10.000x).

Table S4: **Relative abundance of *Bifidobacterium*-derived beta-galactosidase and ABC transporters for oligosaccharides during postnatal weeks 3-6.** Relative abundances were calculated using iBAQ intensities.

Figure S1: **Weighted unifracs distance between (A) and within (B) infants.**

A: Unifrac distance was determined with samples collected from all infants at time points meconium, week 1 and week 2 to show variation between infants at these time points.

B: Unifrac distance was determined with samples collected from each infant during the first two postnatal weeks to show variation within infants.

Mec: meconium, A-J: individual infants

Figure S2: **Microbiota composition profiles during the first two postnatal weeks.**

Taxonomy is based on 16S-rRNA gene sequencing. Taxonomic profiles are shown for each available time point (1-14) per infants (A-J).

Figure S3: **Principal response curve analysis summarising the differences in protein-based taxonomic profiles (A), 16S-based taxonomic profiles (B) and protein-based KEGG Orthology identifier profiles between EP25-26, EP27 and VP infants throughout postnatal weeks 3-6.** The response curve of VP infants is set as the reference to which the other infant groups are compared.

Figure S4: **Proportion of aerobes/fac. anaerobes and anaerobes according to 16S-rRNA gene sequencing (A) and metaproteomics (B) data.** Per time point, average relative abundance per gestational age group is shown.

Figure S5: **Taxonomic profiles per functional category.** Taxonomic profiles were made for the most abundant KEGG Brite level B functional categories. Per time point, average relative abundances for each GA group are shown. Relative abundances were calculated using iBAQ intensities. Mec: meconium

Figure S6: **Protein-based (A) and 16S-based (B) taxonomic profiles and protein-based functional profiles (C) for all samples collected during postnatal weeks 3-6.**

Table S1: **Sampling scheme for metaproteomics and 16S-rRNA sequencing.** Red dots: samples for metaproteomics, Black dots: samples for 16s-rRNA gene sequencing, A-J: individual infants.

| Infant / Time point | 1  | 2  | 3  | 4  | 5  | 6  | Wk 1 | 8  | 9  | 10 | 11 | 12 | 13 | Wk 2 | Wk 3 | Wk 4 | Wk 6 |
|---------------------|----|----|----|----|----|----|------|----|----|----|----|----|----|------|------|------|------|
| A                   |    |    |    | ●● |    | ●  | ●    | ●  | ●  | ●  | ●  | ●  |    | ●●   | ●    | ●●   | ●●   |
| B                   |    | ●  |    | ●  |    |    |      | ●  | ●  | ●  | ●  | ●  | ●● | ●    | ●●   | ●    | ●●   |
| C                   |    |    | ●  | ●● |    |    | ●●   | ●  | ●  |    | ●  | ●  | ●  | ●●   | ●●   | ●●   | ●●   |
| D                   |    |    | ●  | ●  | ●  | ●● |      | ●  | ●  |    | ●  | ●  | ●  | ●●   | ●●   | ●●   | ●●   |
| E                   |    | ●● |    | ●  | ●  |    | ●●   | ●  |    |    | ●  | ●  | ●● | ●    | ●●   | ●●   | ●●   |
| F                   |    |    | ●● | ●  |    |    | ●    |    | ●  |    | ●  | ●  | ●  | ●●   | ●●   | ●    | ●●   |
| G                   |    | ●  | ●  | ●  |    | ●  | ●●   |    | ●  | ●  |    |    |    | ●    | ●●   | ●●   | ●●   |
| H                   | ●● | ●● | ●  | ●● | ●● |    | ●●   |    | ●● | ●  | ●● | ●● | ●● | ●●   | ●●   | ●●   | ●●   |
| I                   |    |    | ●● | ●  | ●  | ●  |      | ●● | ●  | ●  | ●● |    |    | ●    | ●●   | ●●   | ●●   |
| J                   |    |    | ●● |    | ●  | ●  | ●●   | ●  | ●  | ●  | ●  | ●  | ●● |      | ●●   | ●●   | ●●   |

**Table S2: Contents of the in-house generated protein database**

| Kingdom  | Species         | Sequences         | Taxonomy Uniprot ; reference proteome                                                                           |                                                                                                                         |
|----------|-----------------|-------------------|-----------------------------------------------------------------------------------------------------------------|-------------------------------------------------------------------------------------------------------------------------|
| Bacteria | Bifidobacterium | 1723              | 206672 - Bifidobacterium longum (strain NCC 2705) ; Reference proteome                                          |                                                                                                                         |
|          |                 | 1834              | 484020 - Bifidobacterium bifidum BGN4 ; Reference proteome                                                      |                                                                                                                         |
|          |                 | 1838              | 1254439 - Bifidobacterium thermophilum RBL67 ; Reference proteome                                               |                                                                                                                         |
|          |                 | 1525              | 442563 - Bifidobacterium animalis subsp. lactis (strain AD011) ; Reference proteome                             |                                                                                                                         |
|          |                 | 2121              | 401473 - Bifidobacterium dentium (strain ATCC 27534 / DSM 20436 / JCM 1195 / Bd1) ; Reference proteome          |                                                                                                                         |
|          |                 | 1629              | 367928 - Bifidobacterium adolescentis (strain ATCC 15703 / DSM 20083 / NCTC 11814 / E194a) ; Reference proteome |                                                                                                                         |
|          |                 | 1913              | 1385940 - Bifidobacterium breve JCM 7019                                                                        |                                                                                                                         |
|          |                 | 1659              | 1263060 - Bifidobacterium pseudocatenulatum CAG:263                                                             |                                                                                                                         |
|          |                 | Propionibacterium | 2294                                                                                                            | 267747 - Propionibacterium acnes (strain KPA171202 / DSM 16379) ; reference proteome (Reference proteome)               |
|          |                 | Xanthomonadales   | 4365                                                                                                            | 522373 - Stenotrophomonas maltophilia (strain K279a) ; Reference proteome                                               |
|          |                 | Corynebacterium   | 2265                                                                                                            | 257309 - Corynebacterium diphtheriae (strain ATCC 700971 / NCTC 13129 / Biotype gravis) ; Reference proteome            |
|          |                 |                   | 2508                                                                                                            | 548476 - Corynebacterium aurimucosum (strain ATCC 700975 / DSM 44827 / CN-1) ; Reference proteome                       |
|          |                 |                   | 2018                                                                                                            | 645127 - Corynebacterium kroppenstedtii (strain DSM 44385 / CCUG 35717) ; Reference proteome                            |
|          |                 | Bacteroides       | 3543                                                                                                            | 1263037 - Bacteroides caccae CAG:21 ; Reference proteome                                                                |
|          |                 |                   | 4782                                                                                                            | 226186 - Bacteroides thetaiotaomicron (strain ATCC 29148 / DSM 2079 / NCTC 10582 / E50 / VPI-5482) ; Reference proteome |
|          |                 |                   | 4234                                                                                                            | 272559 - Bacteroides fragilis (strain ATCC 25285 / NCTC 9343) ; Reference proteome                                      |
|          |                 |                   | 4465                                                                                                            | 357276 - Bacteroides dorei                                                                                              |
|          |                 | Lactobacillus     | 3038                                                                                                            | 220668 - Lactobacillus plantarum (strain ATCC BAA-793 / NCIMB 8826 / WCFS1); Reference proteome                         |
|          |                 |                   | 2688                                                                                                            | 321967 - Lactobacillus casei (strain ATCC 334) ; Reference proteome                                                     |
|          |                 |                   | 1865                                                                                                            | 557436 - Lactobacillus reuteri (strain DSM 20016) ; reference proteome                                                  |
|          |                 | 2168              | 387344 - Lactobacillus brevis (strain ATCC 367 / JCM 1170) ; reference proteome                                 |                                                                                                                         |
|          |                 | 1851              | 1069534 - Lactobacillus ruminis (strain ATCC 27782 / RF3) ; reference proteome                                  |                                                                                                                         |
|          |                 | 1703              | 362948 - Lactobacillus salivarius (strain UCC118) ; Reference proteome                                          |                                                                                                                         |
|          |                 | 1859              | 272621 - Lactobacillus acidophilus (strain ATCC 700396 / NCK56 / N2 / NCFM) ; Reference proteome                |                                                                                                                         |
|          |                 | 2886              | 1088720 - Lactobacillus rhamnosus ATCC 8530                                                                     |                                                                                                                         |
|          |                 | 2749              | 1446494 - Lactobacillus paracasei N1115                                                                         |                                                                                                                         |

|  |                  |      |                                                                                                                              |
|--|------------------|------|------------------------------------------------------------------------------------------------------------------------------|
|  | Staphylococcus   | 2889 | 93061 - Staphylococcus aureus (strain NCTC 8325) ; Reference proteome                                                        |
|  |                  | 2463 | 176279 - Staphylococcus epidermidis (strain ATCC 35984 / Reference proteome62A) ; Reference proteome                         |
|  | Enterococcus     | 3101 | 226185 - Enterococcus faecalis (strain ATCC 700802 / V583) ; Reference proteome                                              |
|  |                  | 2671 | 333849 - Enterococcus faecium DO ; Reference proteome                                                                        |
|  | Streptococcus    | 1946 | 862971 - Streptococcus anginosus C238                                                                                        |
|  |                  | 1840 | 1069533 - Streptococcus infantarius (strain CJ18)                                                                            |
|  |                  | 2105 | 208435 - Streptococcus agalactiae serotype V (strain ATCC BAA-611 / 2603 V/R) ; Reference proteome                           |
|  |                  | 2030 | 171101 - Streptococcus pneumoniae (strain ATCC BAA-255 / R6) ; Reference proteome                                            |
|  | Clostridium      | 2659 | 195102 - Clostridium perfringens (strain 13 / Type A); Reference proteome                                                    |
|  |                  | 3752 | 272563 - Peptoclostridium difficile (strain 630) ; Reference proteome                                                        |
|  | Enterobacter     | 5044 | 716541 - Enterobacter cloacae subsp. cloacae (strain ATCC 13047 / DSM 30054 / NBRC 13535 / NCDC 279-56) ; Reference proteome |
|  | Escherichia      | 4305 | 83333 - Escherichia coli (strain K12) ; Reference proteome                                                                   |
|  | Shigella         | 3691 | 300267 - Shigella dysenteriae serotype 1 (strain Sd197)                                                                      |
|  | Klebsiella       | 4765 | 272620 - Klebsiella pneumoniae subsp. pneumoniae (strain ATCC 700721 / MGH 78578) ; Reference proteome                       |
|  | Proteus          | 3606 | 529507 - Proteus mirabilis (strain HI4320) ; Reference proteome                                                              |
|  | Veillonella      | 1843 | 479436 - Veillonella parvula (strain ATCC 10790 / DSM 2008 / JCM 12972 / Te3) ; Reference proteome                           |
|  | Pseudomonas      | 5563 | 208964 - Pseudomonas aeruginosa (strain ATCC 15692 / PAO1 / 1C / PRS 101 / LMG 12228) ; Reference proteome                   |
|  | Citrobacter      | 4991 | 290338 - Citrobacter koseri (strain ATCC BAA-895 / CDC 4225-83 / SGSC4696) ; Reference proteome                              |
|  |                  | 4651 | 1333848 - Citrobacter freundii CFNIH1                                                                                        |
|  | Bacillus         | 5219 | 226900 - Bacillus cereus (strain ATCC 14579 / DSM 31) ; Reference proteome                                                   |
|  |                  | 5066 | 1367477 - Bacillus infantis NRRL B-14911 ; Reference proteome                                                                |
|  | Paenibacillus    | 6210 | 324057 - Paenibacillus sp. (strain JDR-2) ; Reference proteome                                                               |
|  | Faecalibacterium | 2755 | 718252 - Faecalibacterium prausnitzii L2-6 ; Reference proteome                                                              |
|  | Ruminococcus     | 2797 | 657313 - Ruminococcus torques L2-14 ; Reference proteome                                                                     |
|  |                  | 1811 | 657321 - Ruminococcus bromii L2-63                                                                                           |
|  | Acinetobacter    | 3465 | 470 - Acinetobacter baumannii ; Reference proteome                                                                           |
|  |                  | 3598 | 871585 - Acinetobacter calcoaceticus (strain PHEA-2)                                                                         |
|  | Rhodanobacter    | 3773 | 666685 - Rhodanobacter denitrificans ; Reference proteome                                                                    |
|  | Eubacterium      | 4506 | 903814 - Eubacterium limosum (strain KIST612) ; Reference proteome                                                           |

|  |                     |      |                                                                                                                                               |
|--|---------------------|------|-----------------------------------------------------------------------------------------------------------------------------------------------|
|  |                     | 3545 | 515619 - Eubacterium rectale (strain ATCC 33656 / VPI 0990) ; Reference proteome                                                              |
|  |                     | 2309 | 1263078 - Eubacterium hallii CAG:12                                                                                                           |
|  | Anaerostipes        | 3141 | 1262699 - Anaerostipes sp. CAG:276 ; Reference proteome                                                                                       |
|  | Roseburia           | 3629 | 718255 - Roseburia intestinalis XB6B4 ; Reference proteome                                                                                    |
|  |                     | 2653 | 1263105 - Roseburia inulinivorans CAG:15 ; Reference proteome                                                                                 |
|  |                     | 3351 | 585394 - Roseburia hominis (strain DSM 16839 / NCIMB 14029 / A2-183) ; Reference proteome                                                     |
|  | Blautia             | 3087 | 1263061 - Blautia hydrogenotrophica CAG:147 ; Reference proteome                                                                              |
|  | Erysipelotrichaceae | 3917 | 1262981 - Erysipelotrichaceae bacterium CAG:64 ; Reference proteome                                                                           |
|  | Fusobacterium       | 2046 | 190304 - Fusobacterium nucleatum subsp. nucleatum (strain ATCC 25586 / CIP 101130 / JCM 8532 / LMG 13131) ; Reference proteome                |
|  | Succinatimonas      | 1970 | 1262974 - Succinatimonas sp. CAG:777 ; Reference proteome                                                                                     |
|  | Haemophilus         | 1707 | 71421 - Haemophilus influenzae (strain ATCC 51907 / DSM 11121 / KW20 / Rd) ; Reference proteome                                               |
|  |                     | 1694 | 233412 - Haemophilus ducreyi (strain 35000HP / ATCC 700724) ; Reference proteome                                                              |
|  | Anaerococcus        | 1691 | 525919 - Anaerococcus prevotii (strain ATCC 9321 / DSM 20548 / JCM 6508 / PC1) ; Reference proteome                                           |
|  | Gardnerella         | 1365 | 525284 - Gardnerella vaginalis (strain ATCC 14019 / 317) ; Reference proteome                                                                 |
|  | Finegoldia          | 1631 | 334413 - Finegoldia magna (strain ATCC 29328) ; Reference proteome                                                                            |
|  | Rothia              | 1991 | 680646 - Rothia mucilaginosa (strain DY-18) ; Reference proteome                                                                              |
|  |                     | 2212 | 762948 - Rothia dentocariosa (strain ATCC 17931 / CDC X599 / XDIA) ; Reference proteome                                                       |
|  | Parabacteriodes     | 3830 | 435591 - Parabacteroides distasonis (strain ATCC 8503 / DSM 20701 / NCTC 11152) ; Reference proteome                                          |
|  |                     | 2964 | 1263094 - Parabacteroides merdae CAG:48 ; Reference proteome                                                                                  |
|  | Bradyrhizobium      | 8253 | 224911 - Bradyrhizobium diazoefficiens (strain JCM 10833 / IAM 13628 / NBRC 14792 / USDA 110) ; Reference proteome                            |
|  | Achromobacter       | 6445 | 762376 - Achromobacter xylosoxidans (strain A8) ; Reference proteome                                                                          |
|  | Subdoligranulum     | 1341 | 1262970 - Subdoligranulum sp. CAG:314 ; Reference proteome                                                                                    |
|  | Blastococcus        | 4793 | 1146883 - Blastococcus saxobsidens (strain DD2) ; Reference proteome                                                                          |
|  | Micrococcus         | 2207 | 465515 - Micrococcus luteus (strain ATCC 4698 / DSM 20030 / JCM 1464 / NBRC 3333 / NCIMB 9278 / NCTC 2665 / VKM Ac-2230) ; Reference proteome |
|  | Dyella              | 4342 | 1379159 - Dyella jiangningensis ; Reference proteome                                                                                          |
|  | Microbacterium      | 3671 | 979556 - Microbacterium testaceum (strain StLB037) ; Reference proteome                                                                       |
|  | Paracoccus          | 3363 | 1367847 - Paracoccus aminophilus JCM 7686 ; Reference proteome                                                                                |
|  |                     | 4403 | 318586 - Paracoccus denitrificans (strain Pd 1222) ; Reference proteome                                                                       |

|                 |                  |       |                                                                                                                                    |
|-----------------|------------------|-------|------------------------------------------------------------------------------------------------------------------------------------|
|                 | Burkholdia       | 4872  | 13373 - Burkholderia mallei                                                                                                        |
|                 |                  | 6902  | 216591 - Burkholderia cenocepacia (strain ATCC BAA-245 / DSM 16553 / LMG 16656 / NCTC 13227 / J2315 / CF5610) ; Reference proteome |
|                 | Methylobacterium | 6566  | 426117 - Methylobacterium sp. (strain 4-46) ; Reference proteome                                                                   |
|                 | Bartonella       | 1466  | 283166 - Bartonella henselae (strain ATCC 49882 / Houston 1) ; Reference proteome                                                  |
| <b>Fungi</b>    | Candida          | 9044  | 237561 - Candida albicans (strain SC5314 / ATCC MYA-2876) ; Reference proteome                                                     |
|                 |                  | 6226  | 294747 - Candida tropicalis (strain ATCC MYA-3404 / T1) ; Reference proteome                                                       |
|                 |                  | 5780  | 578454 - Candida parapsilosis (strain CDC 317 / ATCC MYA-4646) ; Reference proteome                                                |
|                 |                  | 5209  | 284593 - Candida glabrata (strain ATCC 2001 / CBS 138 / JCM 3761 / NBRC 0622 / NRRL Y-65) ; Reference proteome                     |
| <b>Animalia</b> | Homo sapiens     | 67493 | 9606 - Homo sapiens ; Reference proteome                                                                                           |
|                 | Bos taurus       | 23898 | 9913 - Bos taurus ; Reference proteome                                                                                             |

Table S3: **Correlation between 16S- and protein-based taxonomic classification.** P-values below 0.05 are considered significant (Spearman correlation with Monte Carlo permutation 10.000x).

|                             |                        |                                |                      |                      |                   |                     |                       |
|-----------------------------|------------------------|--------------------------------|----------------------|----------------------|-------------------|---------------------|-----------------------|
|                             | <i>Bifidobacterium</i> | <i>Enterobacter/Klebsiella</i> | <i>Enterococcus</i>  | <i>Streptococcus</i> | <i>Veilonella</i> | <i>Clostridium</i>  | <i>Staphylococcus</i> |
| <b>Spearman correlation</b> | 0.794*                 | 0.739*                         | 0.572*               | 0.686*               | 0.029             | 0.495*              | 0.226                 |
| <b>p-value</b>              | 7.537E-07              | 1.063E-05                      | 0.002                | 7.809E-05            | 0.884             | 0.009               | 0.256                 |
|                             | <i>Corynebacterium</i> | <i>Propionibacterium</i>       | <i>Lactobacillus</i> | <i>Escherichia</i>   | <i>Finegoldia</i> | <i>Anaerococcus</i> | <i>Haemophilus</i>    |
| <b>Spearman correlation</b> | 0.206                  | 0.114                          | 0.052                | -0.210               | 0.317             | 0.097               | -0.099                |
| <b>p-value</b>              | 0.304                  | 0.573                          | 0.798                | 0.293                | 0.107             | 0.629               | 0.622                 |

\* Significant correlation



**Table S4: Relative abundance of *Bifidobacterium*-derived beta-galactosidase and ABC transporters for oligosaccharides during postnatal weeks 3-6.** Relative abundances were calculated using iBAQ intensities.

Bifidobacterium derived beta-galactosidase

| GA group | Mean     | SD       | 25-26 vs 27 | 25-26 vs 30 | 27 vs 30 |
|----------|----------|----------|-------------|-------------|----------|
| EP 25-26 | 1.38E-04 | 1.57E-04 | 0.258       | 0.029*      | 0.028*   |
| EP 27    | 5.13E-05 | 9.70E-05 |             |             |          |
| VP       | 8.93E-03 | 1.40E-02 |             |             |          |

Bifidobacterium derived ABC transporters for oligosaccharides

| GA group | Mean     | SD       | 25-26 vs 27 | 25-26 vs 30 | 27 vs 30  |
|----------|----------|----------|-------------|-------------|-----------|
| EP 25-26 | 2.60E-03 | 3.26E-03 | 0.171       | 0.00007**   | 0.00002** |
| EP 27    | 5.91E-04 | 8.85E-04 |             |             |           |
| VP       | 1.70E-02 | 1.01E-02 |             |             |           |

\* Independent sample t-test  $p < 0.05$

\*\* Independent sample t-test  $P < 0.001$

A

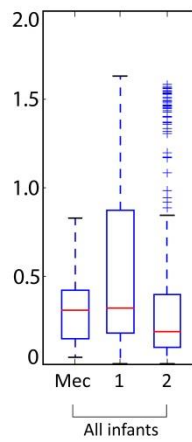

B

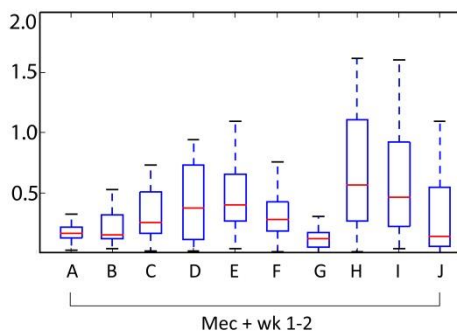

**Figure S1: Weighted unifrac distance between (A) and within (B) infants.**

A: Unifrac distance was determined with samples collected from all infants at time points meconium, week 1 and week 2 to show variation between infants at these time points.

B: Unifrac distance was determined with samples collected from each infant during the first two postnatal weeks to show variation within infants.

Mec: meconium, A-J: individual infants

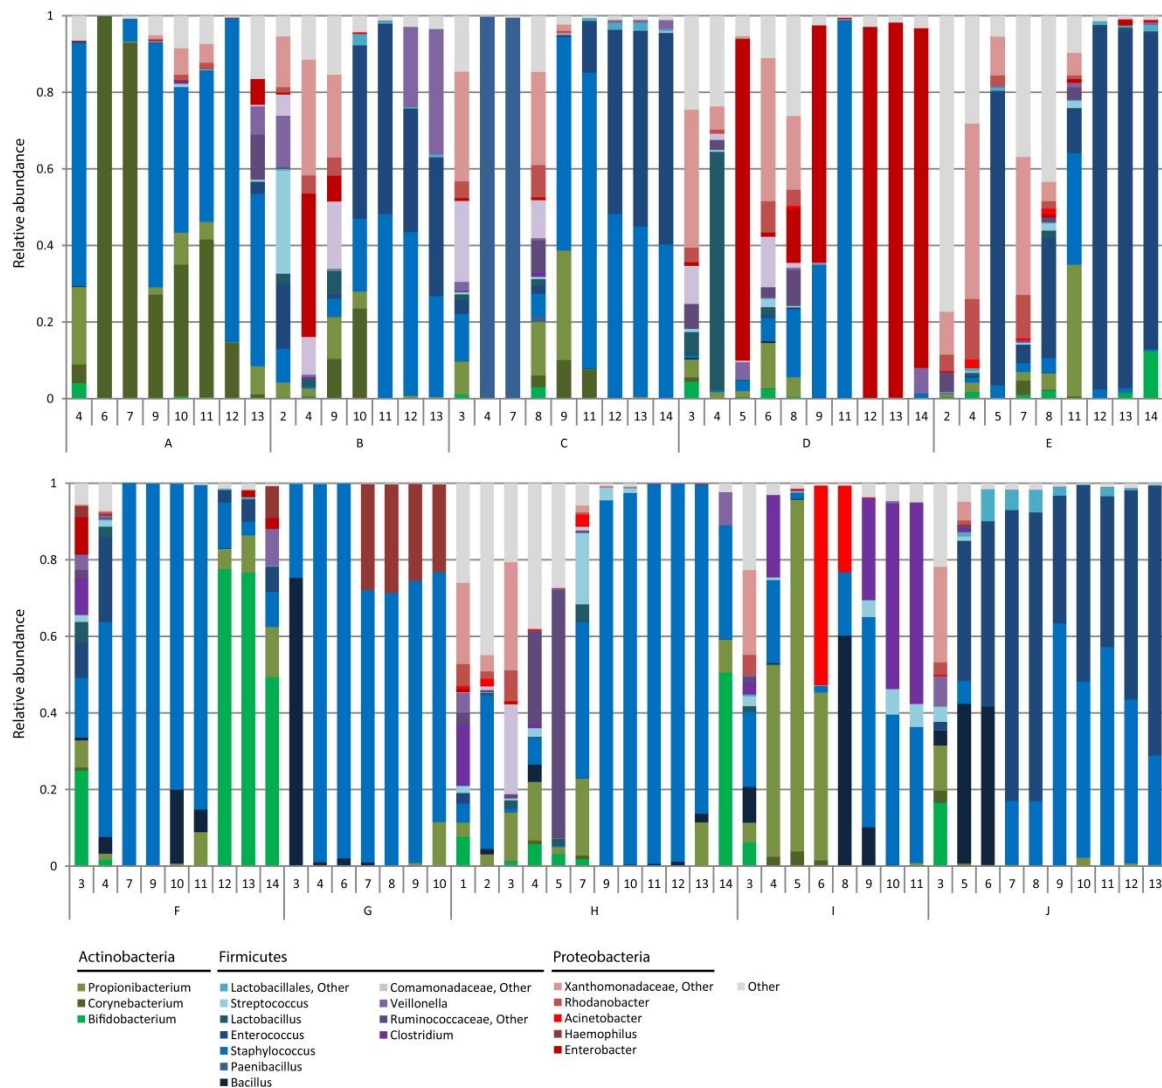

**Figure S2: Microbiota composition profiles during the first two postnatal weeks.** Taxonomy is based on 16S-rRNA gene sequencing. Taxonomic profiles are shown for each available time point (1-14) per infant (A-J).

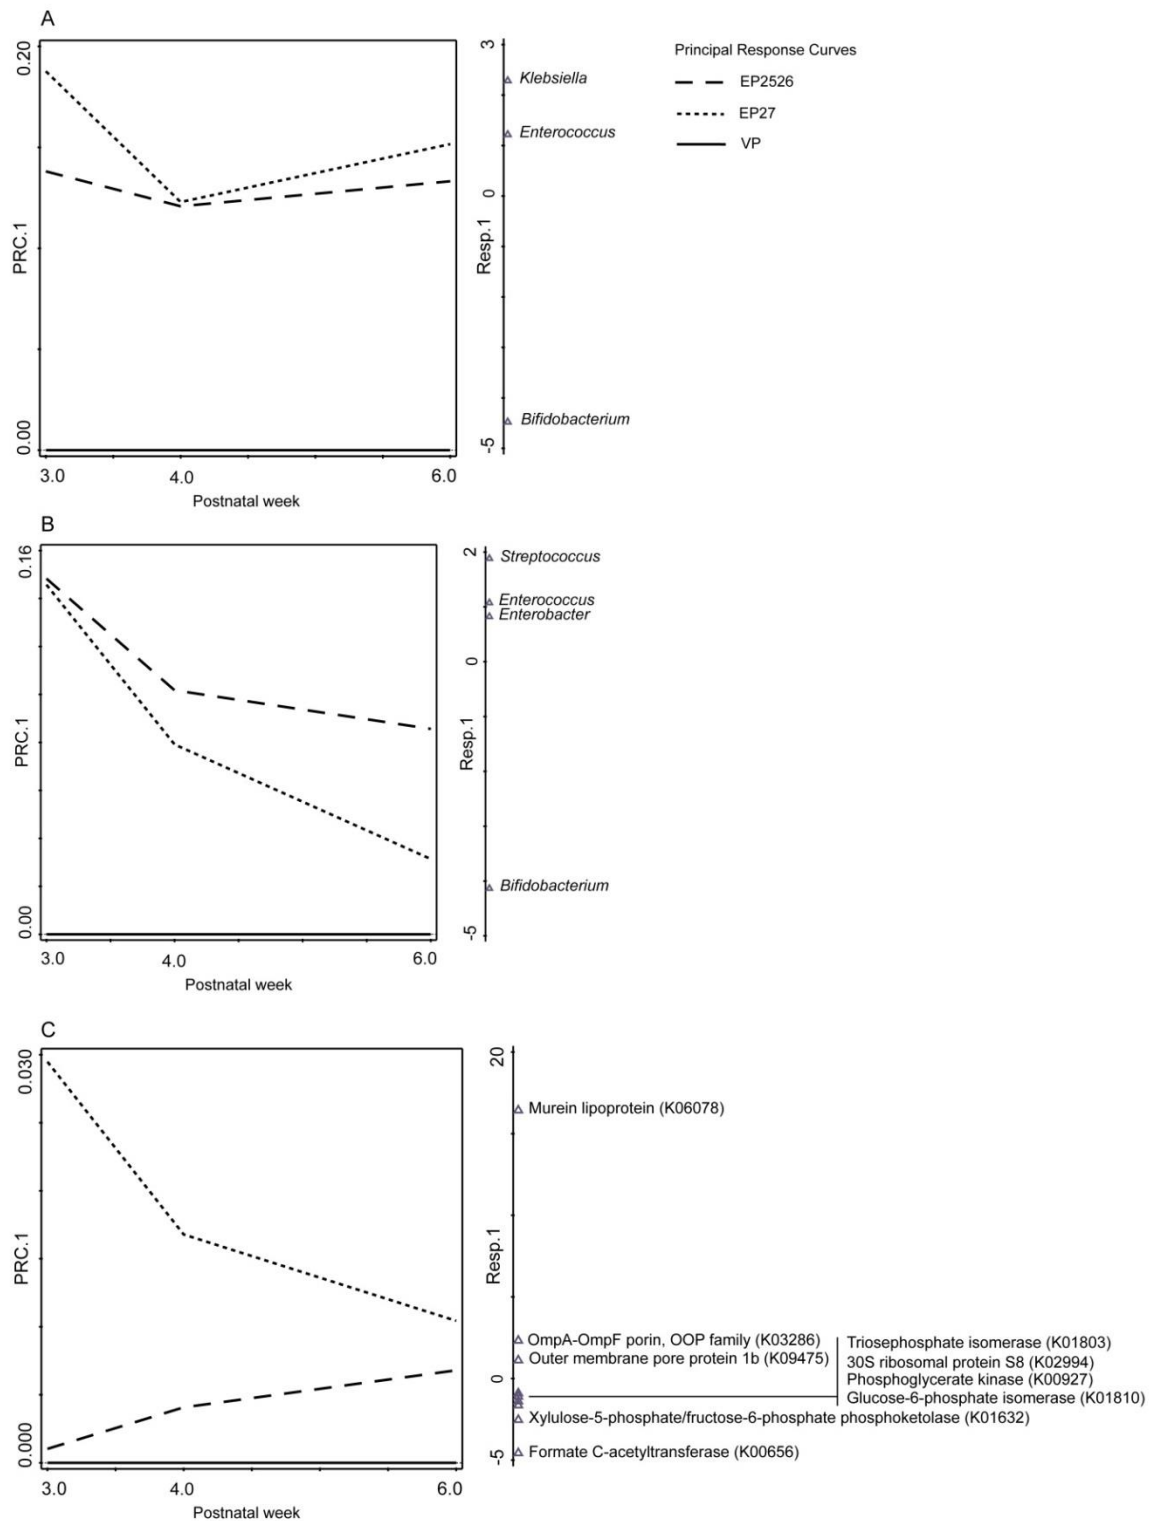

Figure S3: **Principal response curve analysis summarising the differences in protein-based taxonomic profiles (A), 16S-based taxonomic profiles (B) and protein-based KEGG Orthology identifier profiles between EP25-26, EP27 and VP infants throughout postnatal weeks 3-6. Genera and proteins with a score lower than -0.85 or higher than 0.85 are shown on Resp.1.**

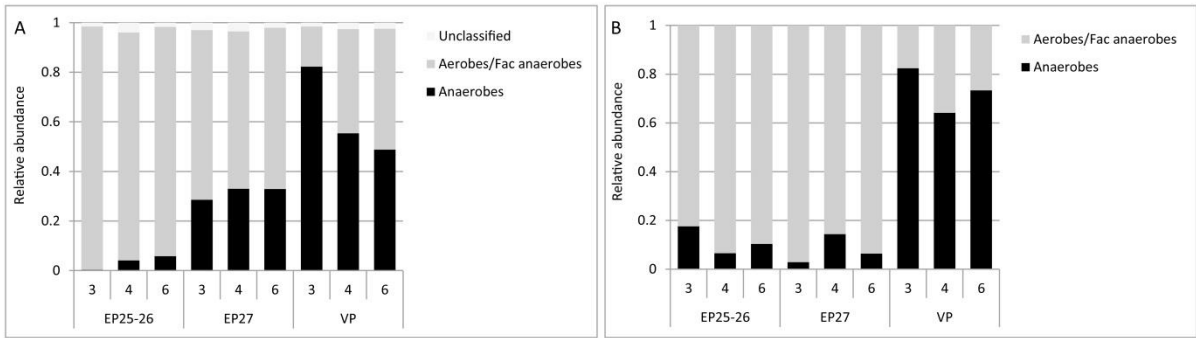

**Figure S4: Proportion of aerobes/fac. anaerobes and anaerobes according to 16S-rRNA gene sequencing (A) and metaproteomics (B) data.** Per time point, average relative abundance per gestational age group is shown.

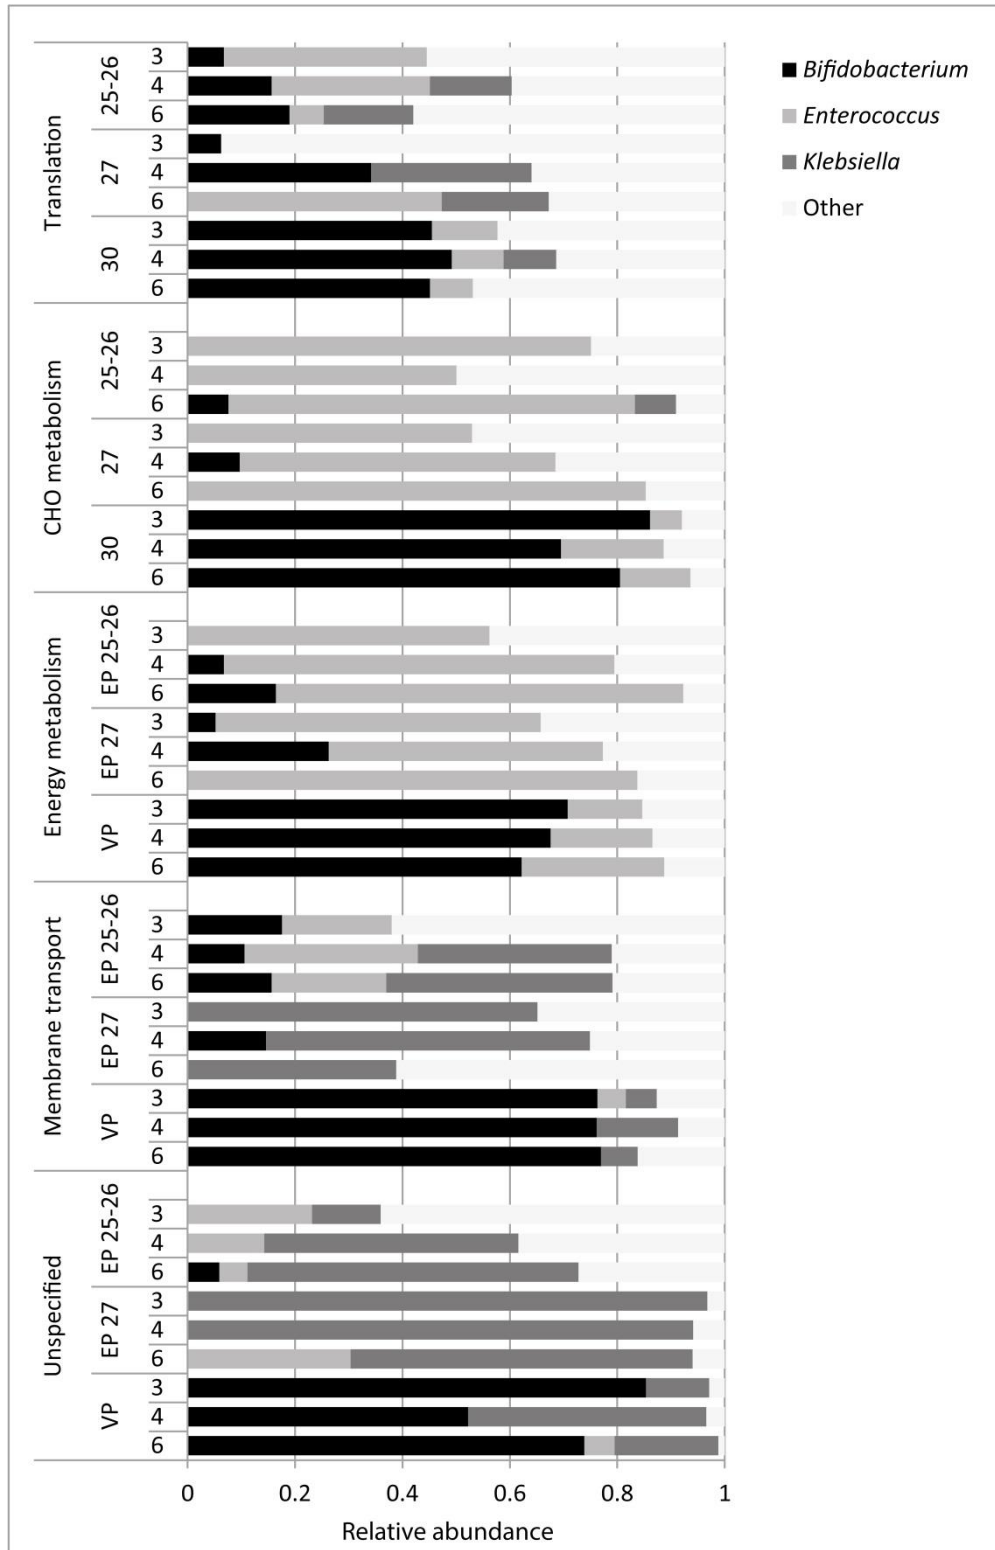

Figure S5: **Taxonomic profiles per functional category.** Taxonomic profiles were made for the most abundant KEGG Brite level B functional categories. Per time point, average relative abundances for each GA group are shown. Relative abundances were calculated using iBAQ intensities.

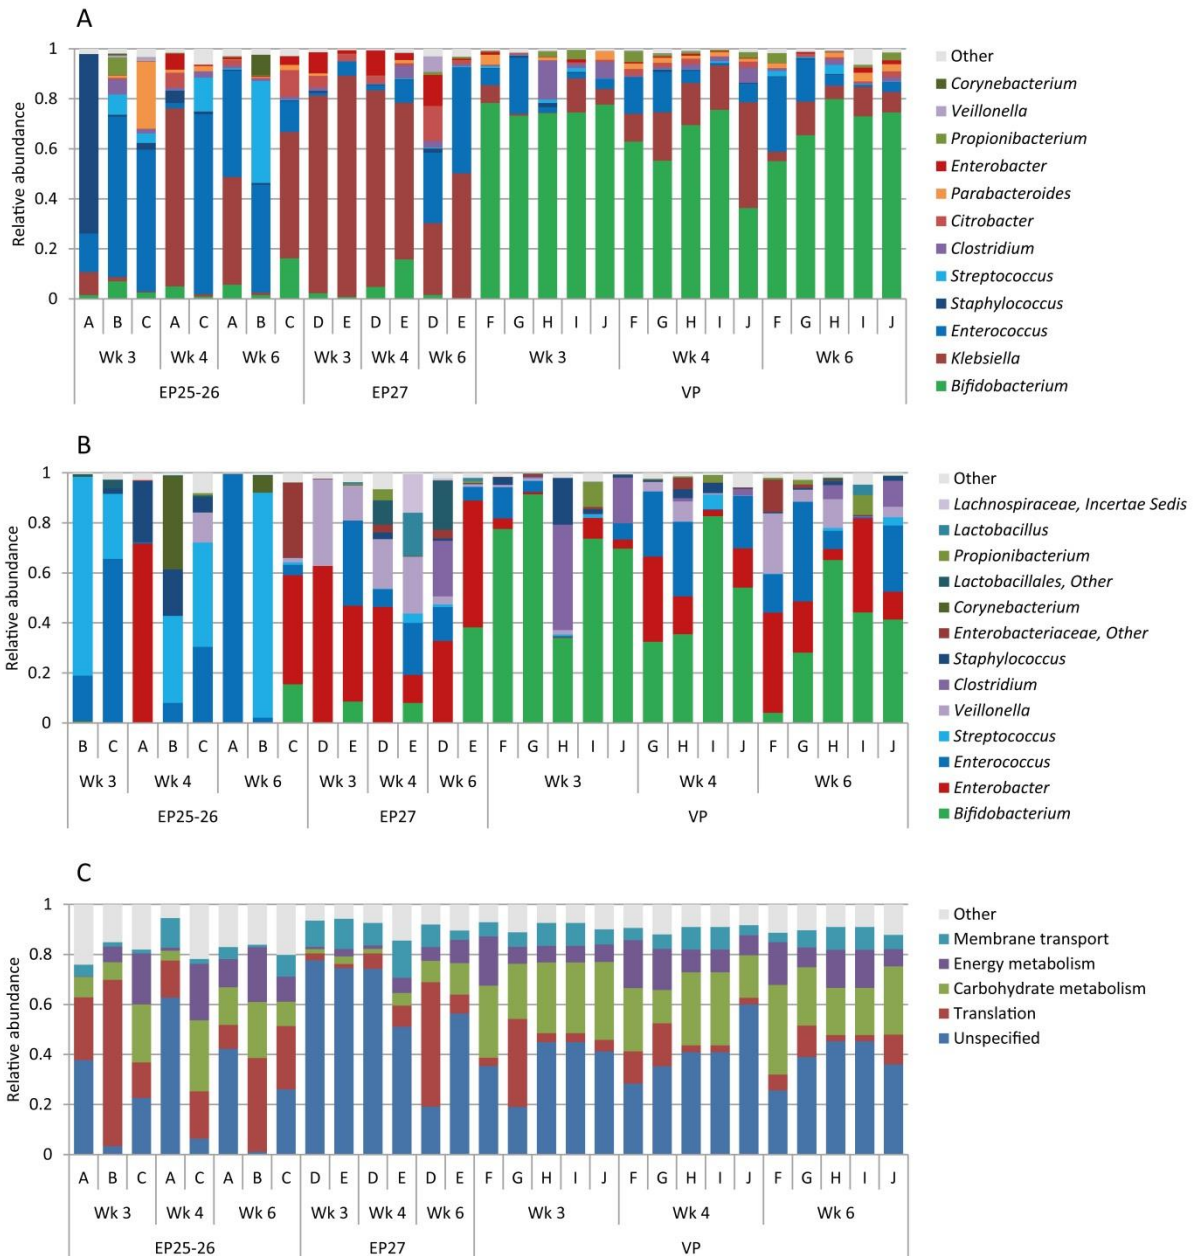

**Figure S6: Protein-based (A) and 16S-based (B) taxonomic profiles and protein-based functional profiles (C) for all samples collected during postnatal weeks 3-6.**
